# Supplementary material for: Transmogrifying waste blister packs into defect-engineered graphene-like turbostratic carbon: novel lithium-ion (Li-ion) battery anode with noteworthy electrochemical characteristics
Source: Royal Society of Chemistry journal article supplement (doi:10.1039/d1nr07183a), 2022-01-01
Supplement: d1nr07183a1.pdf [file d1nr07183a1.pdf]

## Supplementary Information

### Transmogrifying the waste blister packs into defect engineered graphene-like turbostratic carbon: Novel Lithium-ion (Li-ion) battery anode with noteworthy electrochemical characteristics

#### Raman spectroscopic profile-fitting results of blister derived carbon materials (BCAM's)

The degree of graphitization in the prepared carbonaceous materials was further revealed by Raman spectroscopic characterization and the results are included in Figure 4(e-h) and SI-2 (a-c). To get more insights into the degree of graphitization and level of disorders in the blister packs derived carbon anode materials (BCAM's) deconvolution of the Raman spectroscopic results were done and the outcomes are included in SI-2 (a-c).

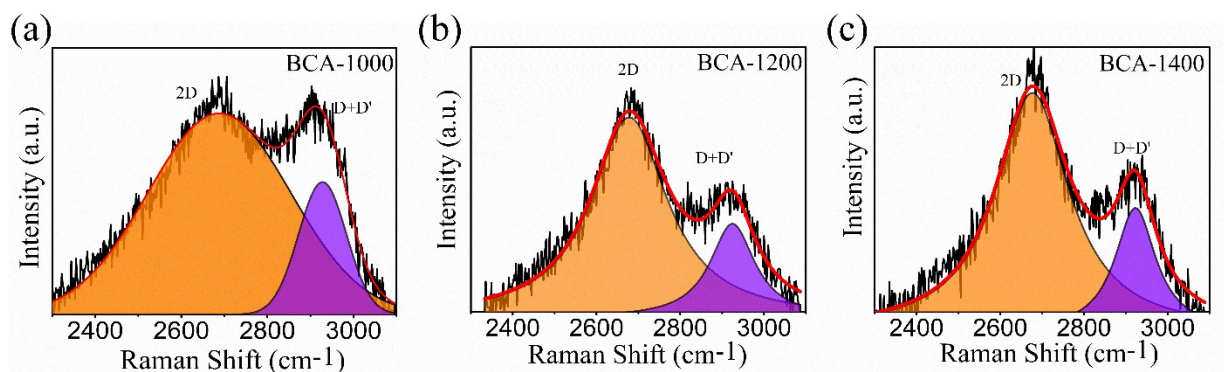

Fig. S1 Raman spectroscopic fitting results of blister derived carbon materials (BCAM's), (a-c) profile fitting curves of 2D and D+D' bands

From the figure, it is quite evident that BCAM's carbons showed four distinct Raman speaks, respectively. These results noted that when the activation temperature increased, the size of the graphitic crystal planes and disordered carbon domains both increased, which, in turn, promoted the growth of the average grain size of turbostratic carbons and disorders.

### EIS data interpretation for BCAM's (After 1000 cycles)

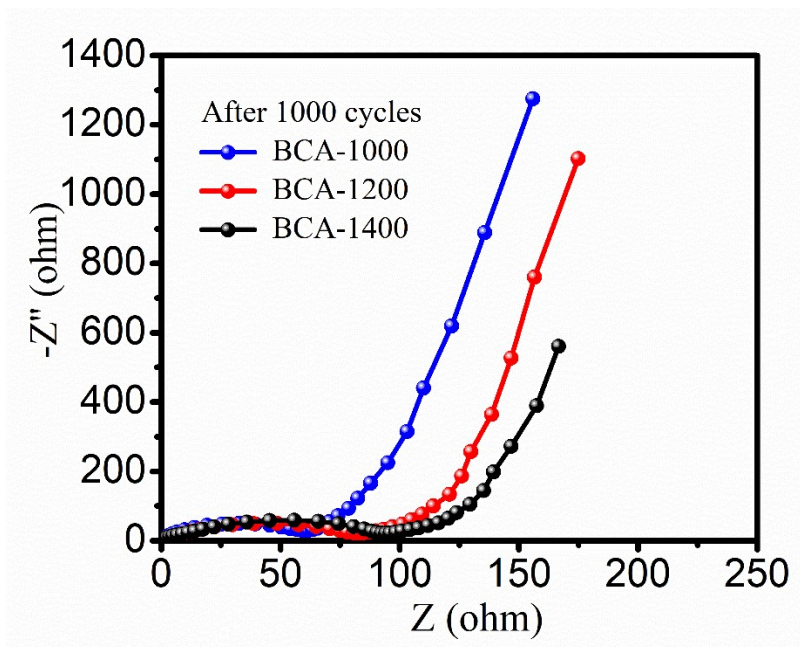

Fig. S2 Electrochemical impedance spectroscopic (EIS) results of Blister derived anode carbon materials (BCAM's) after cycles of measurements in the frequency range of 100 kHz-0.01 Hz.

**Table S1: Comparison table of some waste material derived carbon for lithium ion****batteries**

|                           | Type of carbon material                     | BET surface area (m <sup>2</sup> g <sup>-1</sup> ) | Discharge capacity (mAh g <sup>-1</sup> ) | Capacity retention                                                | Ref. |
|---------------------------|---------------------------------------------|----------------------------------------------------|-------------------------------------------|-------------------------------------------------------------------|------|
| Waste materials to carbon | Waste Tire Derived Carbon Material          | -                                                  | 432 (0.1C)                                | 94% after 80cycles (0.1C)                                         | 1    |
|                           | Waste Tire Derived Carbon                   | 369                                                | 350 (300 mAg <sup>-1</sup> )              | 81 % capacity retention after 500 cycles (300 mAg <sup>-1</sup> ) | 2    |
|                           | HDPE-C Polyethylene Waste derived carbon    | 673.5                                              | 440 (1C)                                  | 270 mAh g <sup>-1</sup> after 500 cycles C/5 rate                 | 3    |
|                           | S700 Activated carbon from e-waste plastics | 496.96                                             | 362 (3 mAg <sup>-1</sup> )                | ~150 mAh g <sup>-1</sup> after 50 cycles 10 mA g <sup>-1</sup>    | 4    |
|                           | SM-AC Green tea wastes                      | 1241                                               | 498 (0.1C)                                | 86 % after 100 cycles (0.1C)                                      | 5    |
| Present Work              | BCA-1400-Blister pack waste derived carbon  | 11.4                                               | 594 (0.1C)                                | 89 % after 2000 cycles (1C)                                       | -    |

**References**

- [1].J. S. Gnanaraj, R. J. Lee, A. M. Levine, J. L. Wistrom, S. L. Wistrom, et.al., *Sustainability*, 2018, 10, 2840.
- [2].T. Veldevi, S. Raghu, R.A. Kalaivani, A. M. Shanmugharaj, *Chemosphere*,2022, 288, 132438.
- [3].S. Villagómez-Salas, P. Manikandan, S. F. Acuna Guzman, V. G. Pol, *ACS omega*, 2018, 3, 17520-17527.
- [4].U. Kumar, D. Goonetilleke, V. Gaikwad, J. C. Pramudita, R. K. Joshi, N. Sharma, V. Sahajwalla, *ACS Sustainable Chemistry & Engineering*, 2019, 7, 10310-10322.
- [5].S. Sankar, S. Saravanan, A. T. A. Ahmed, A. I. Inamdar, H. Im, S. Lee, D. Y. Kim, *Materials Letters*, 2019, 240, 189-192.
